# Supplementary material for: The TyphiNET data visualisation dashboard: unlocking Salmonella Typhi genomics data to support public health
Source: Springer Nature journal article supplement (doi:10.1186/s13073-025-01470-4), 2025-05-09
Supplement: MOESM1 [file 13073_2025_1470_MOESM1_ESM.pdf]

# Supplementary materials

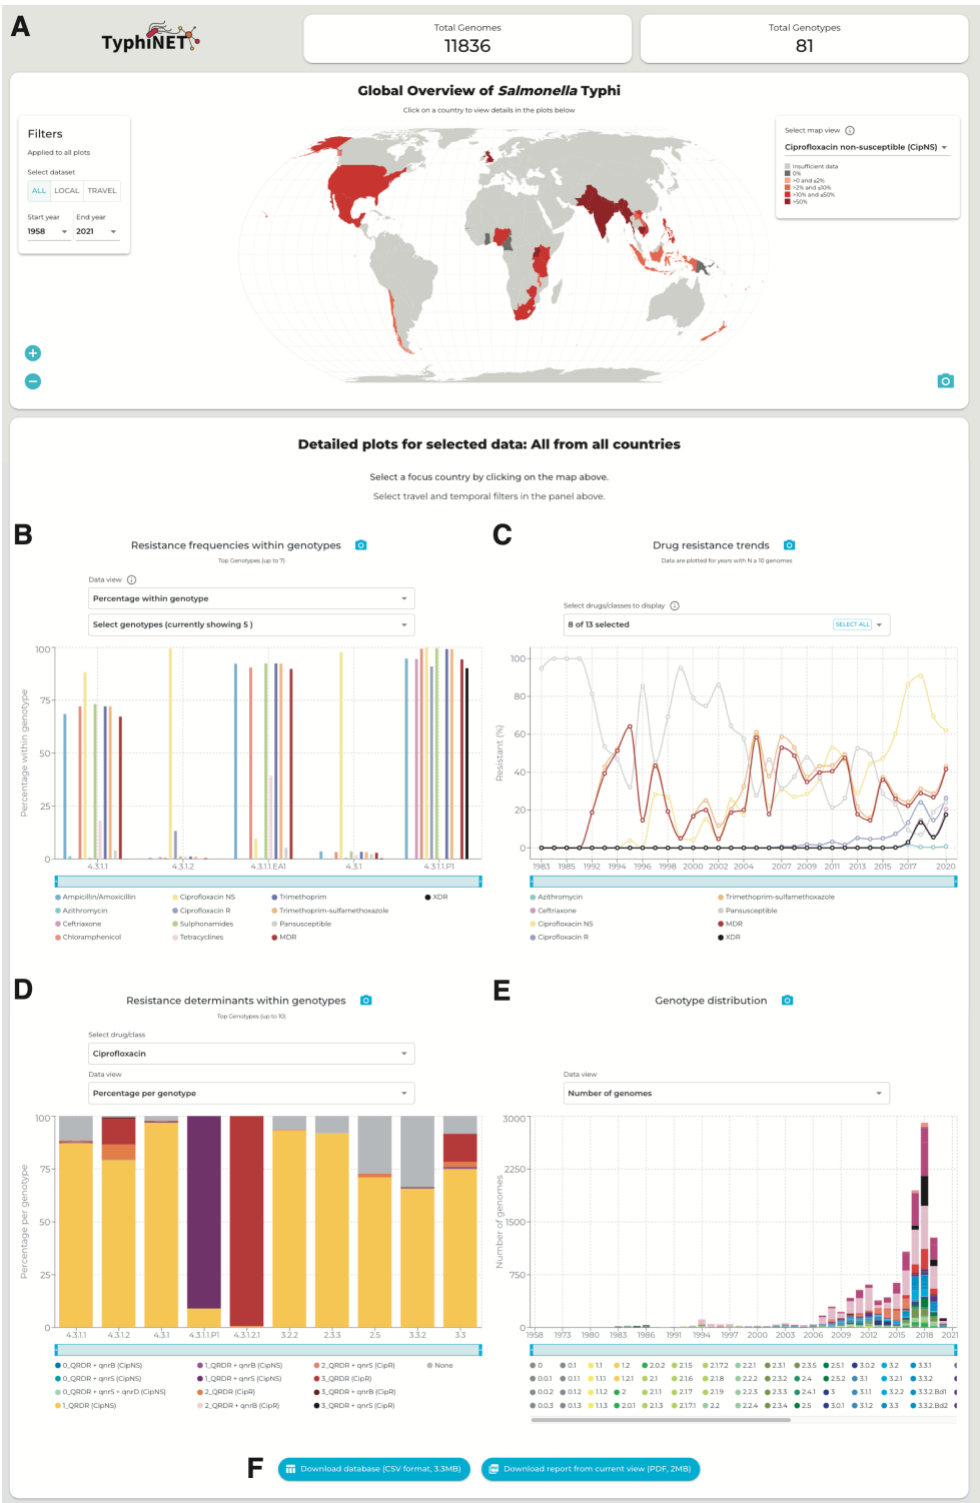

**Fig S1. Dashboard User Interface. (A) Global map view of ciprofloxacin non-susceptible Typhi.** Countries on the map are coloured by ciprofloxacin non-susceptibility frequency as per the inset legend (top right of map). Data are shown where there are  $\geq 20$  sequences available for the country of interest. **(B) Resistance frequencies within genotypes plot shows frequencies of resistance to different drug classes for common genotypes.** Bars are coloured by drug class as per the inset legend. **(C) Drug resistance trends plot shows frequencies of resistance to selected drug classes per year.** Lines are coloured by drug class as per the inset legend. **(D) Resistance determinants within pathogen genotypes plot shows the distribution of specific genes and mutations mediating resistance to a select drug class within common pathogen genotypes.** Bars are coloured by resistance determinants as per the inset legend. **(E) Annual genotype distribution plot shows the frequencies of pathogen genotypes circulating annually.** Bars are coloured by pathogen genotype as per the inset legend. **(F) Downloadable database (csv format) and report (pdf report).**

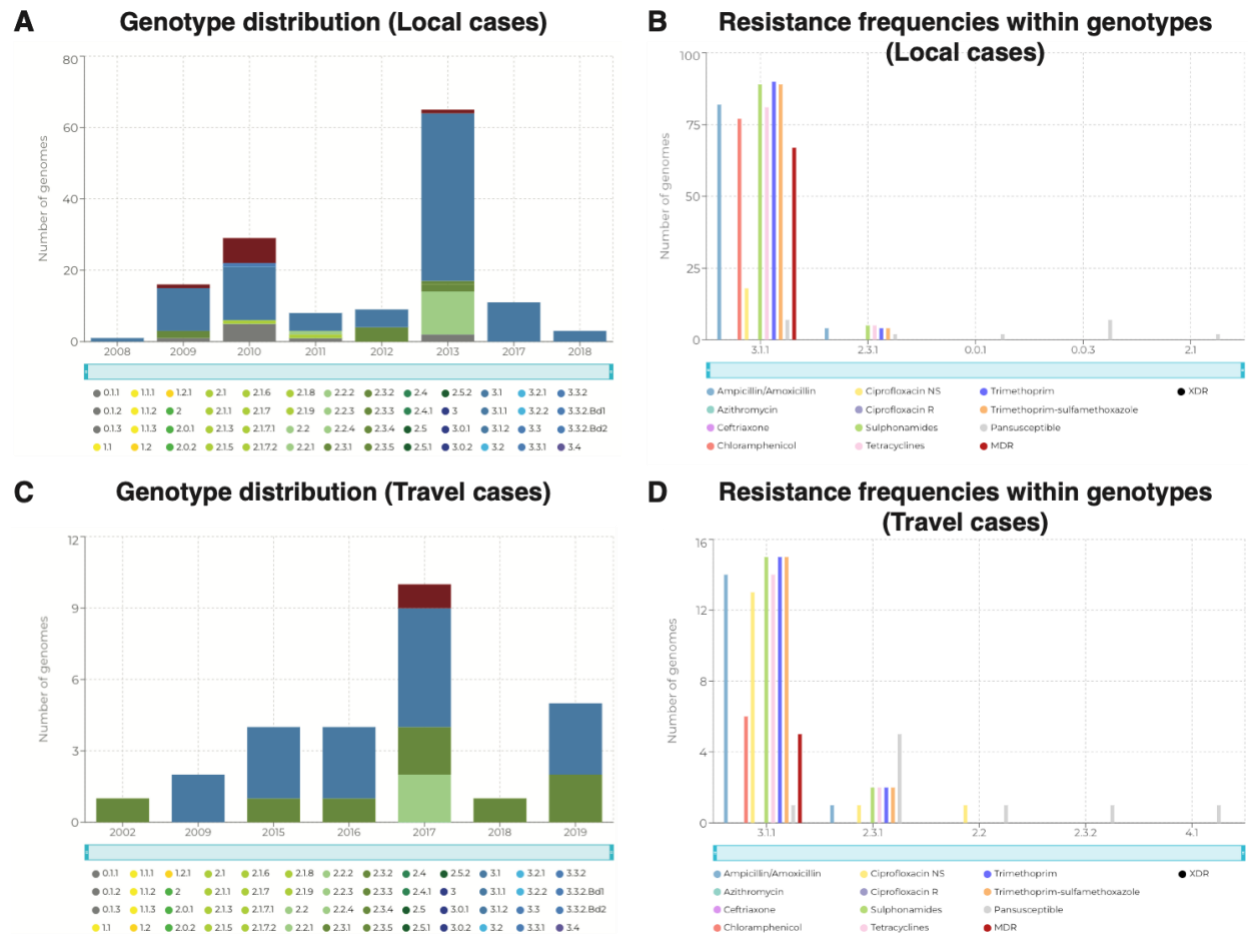

**Fig S2. Frequencies of genotypes and antimicrobial resistance among locally collected and travel-associated cases from Nigeria. (A) National annual pathogen genotype frequencies, derived from locally collected cases. Bars are coloured by pathogen genotypes as per the inset legend. (B) Resistance frequencies stratified by pathogen genotype, derived from locally collected cases. Bars are coloured by drug class as per the inset legend. (C) National annual pathogen genotype frequencies, derived from travel-associated cases. Bars are coloured by pathogen genotypes as per the inset legend. (D) Resistance frequencies stratified by pathogen genotype, derived from travel-associated collected cases. Bars are coloured by drug class as per the inset legend.**

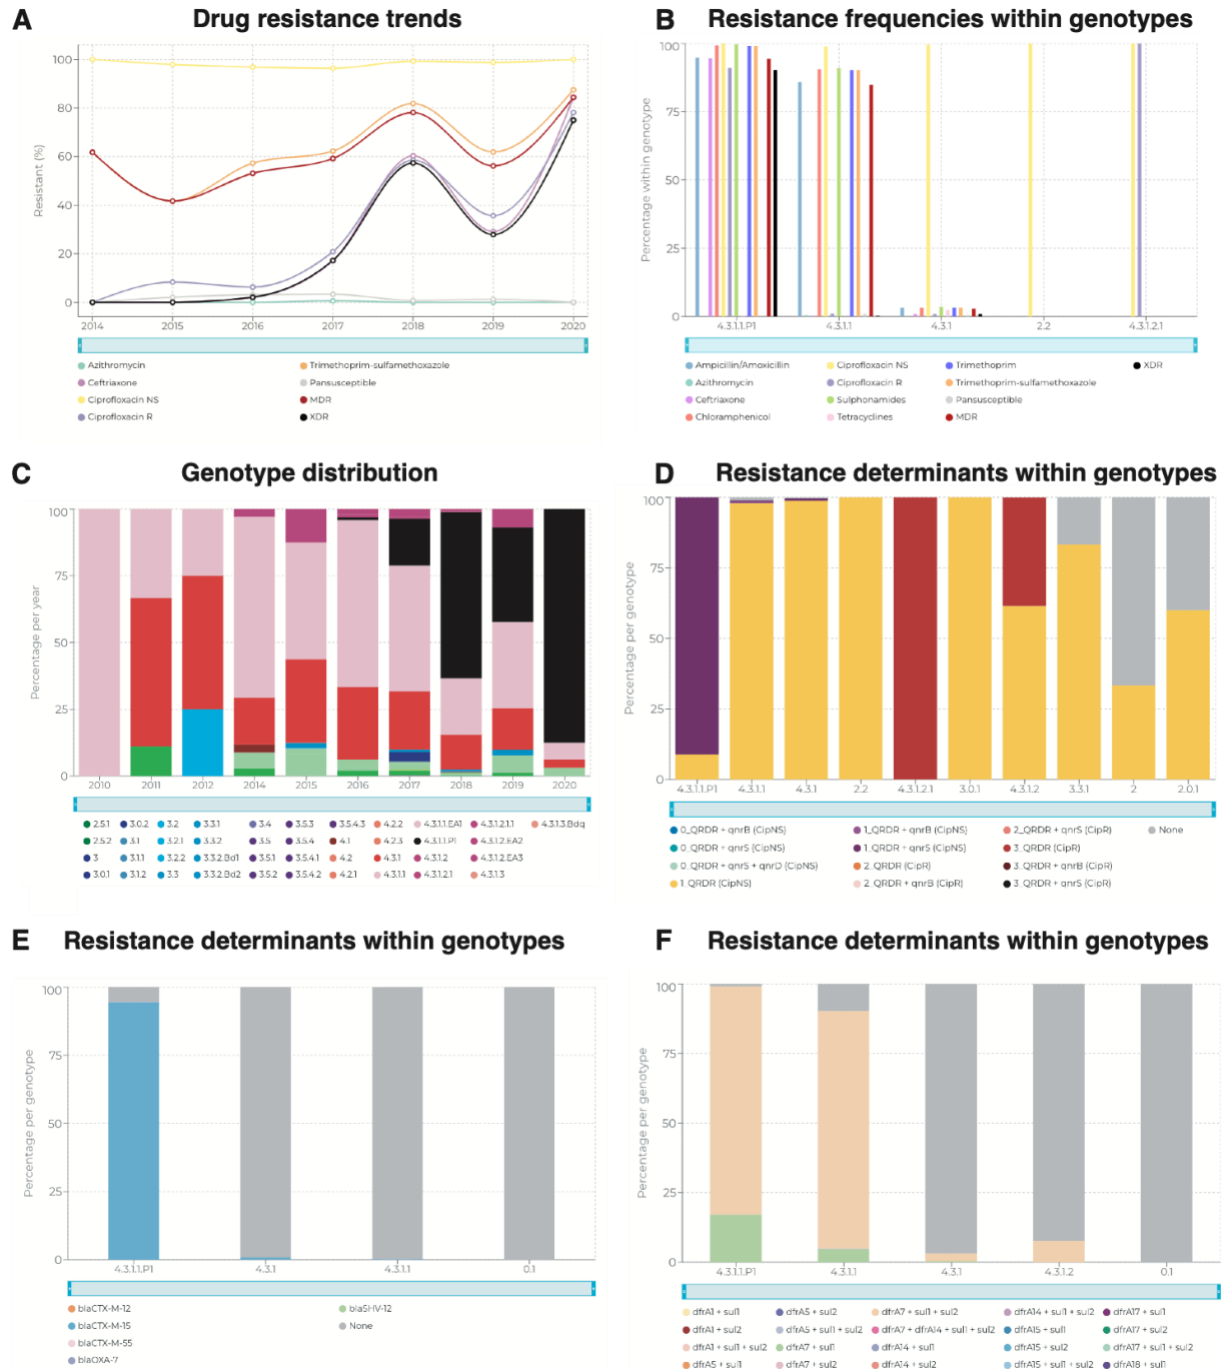

**Fig S3. Exploring the emergence of XDR Typhi in Pakistan with the TyphiNET dashboard. (A) Drug resistance trends over time plot shows frequencies of resistance to selected drug classes in Pakistan per year. Lines are coloured as per the inset legend. (B) ‘Resistance frequencies within genotypes’ plot shows frequencies of resistance to different drug classes, within common genotypes circulating in Pakistan. Bars are coloured according to the inset legend. (C) ‘Annual genotype distribution’ plot shows the frequencies of pathogen genotypes circulating**

**in Pakistan per year. Genotypes are coloured as per the inset legend. (D,E,F) 'Resistance determinants within genotypes' plots show the distribution of specific genes and mutations mediating resistance to a selected drug class, within common pathogen genotypes. Bars are coloured as per the inset legend.**

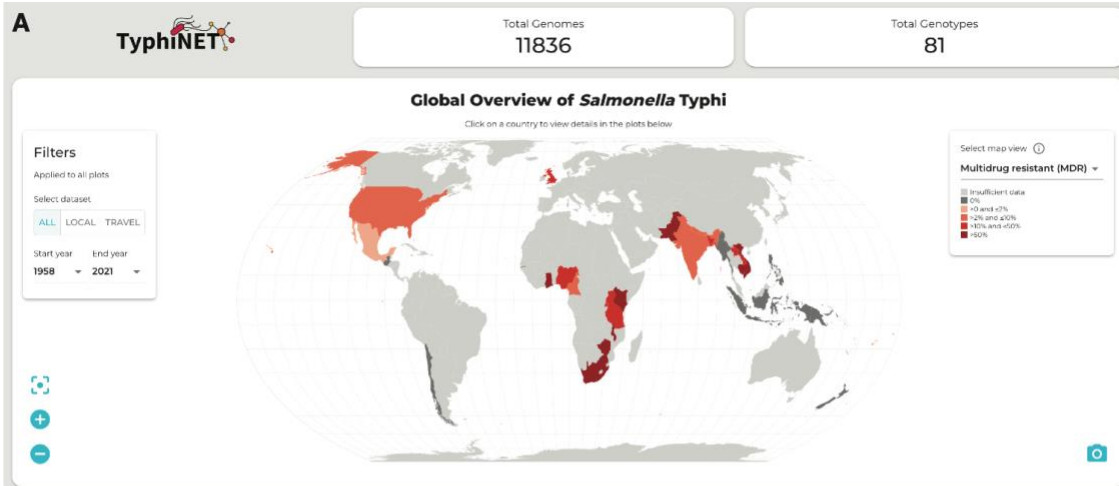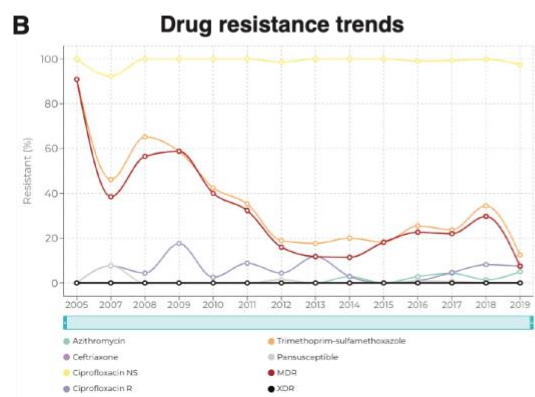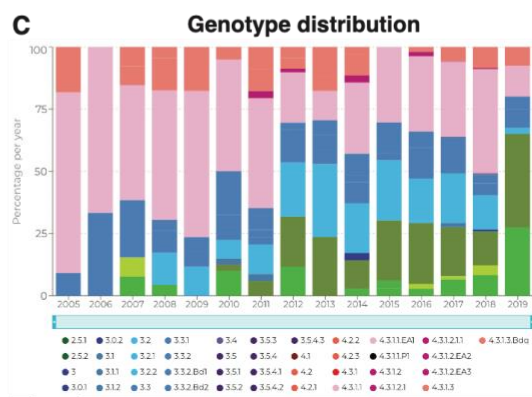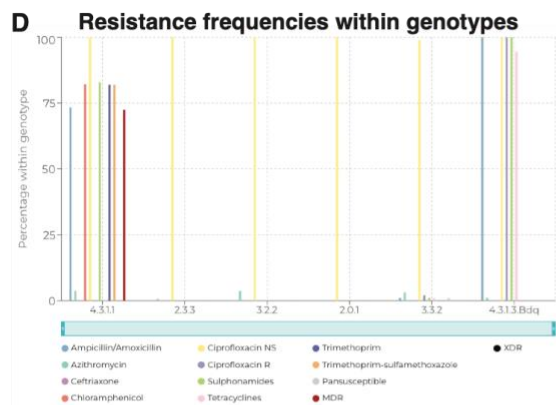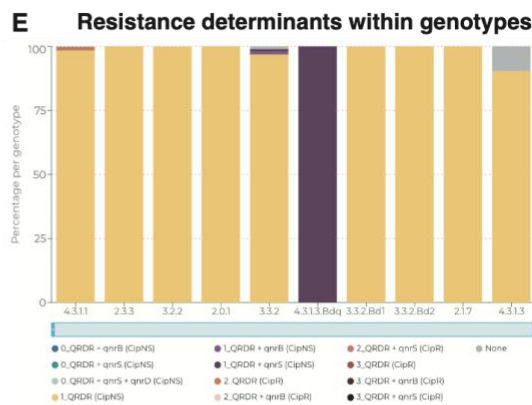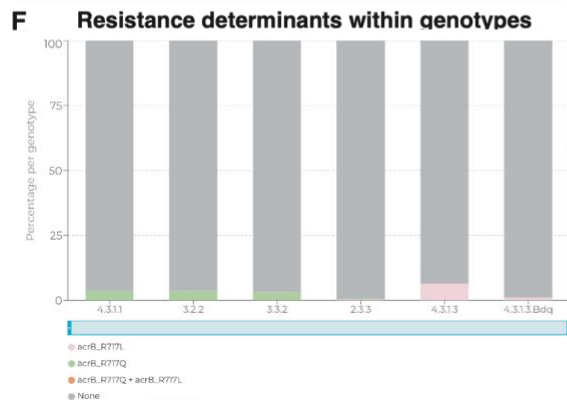

**Fig S4. Decline of MDR and emergence of azithromycin resistance in Bangladesh. (A) Global map view of MDR typhoid.** Countries are coloured by the frequency of MDR cases as per the inset legend. **(B) Drug resistance trends over time plot shows frequencies of resistance to selected drug classes in Bangladesh per year.** Lines are coloured as per the inset legend. **(C) Annual genotype distribution plot shows the frequencies of pathogen genotypes circulating in Bangladesh per year.** Genotypes are coloured as per the inset legend. **(D) Resistance frequencies within genotypes plot shows frequencies of resistance to different drug classes, within common genotypes circulating in Bangladesh.** Bars are coloured according to the inset legend. **(E-F) Resistance determinants within genotypes plot shows the distribution of specific genes and mutations mediating resistance to a selected drug class, within common pathogen genotypes.** Bars are coloured as per the inset legend.

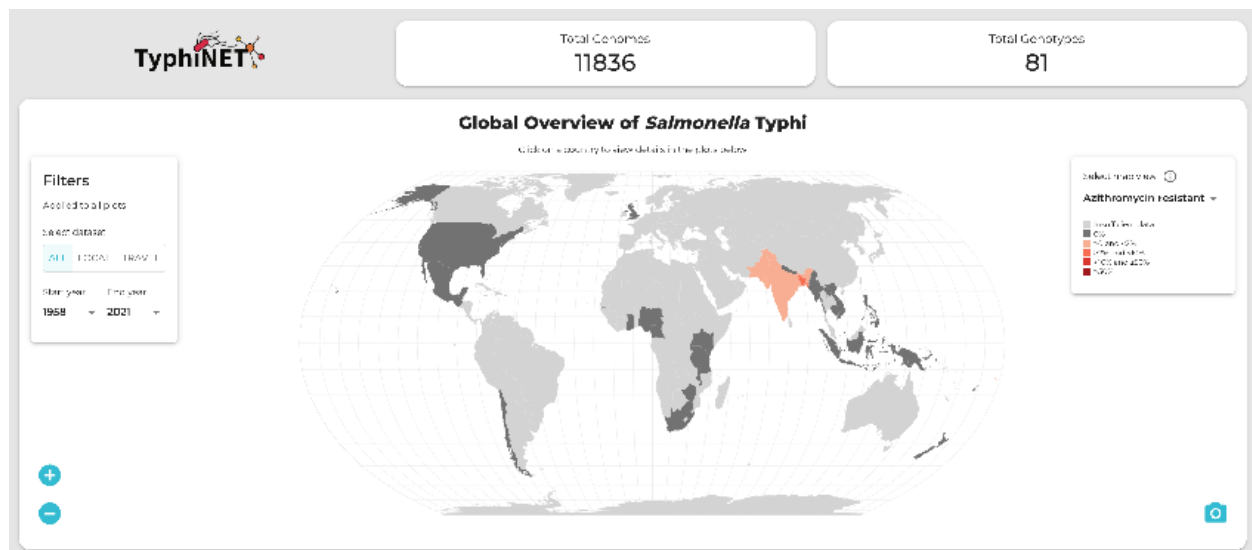

**Fig S5. Global map view of azithromycin resistant Typhi.** Countries on the map are coloured by azithromycin resistance frequency as per the inset legend (top right of map). Data are shown where there are  $\geq 20$  sequences available for the country of interest.





**Fig S6. Variation in genotype distribution and drug-resistance in Malawi from 2009. (A) Global map view of MDR typhoid from 2010 onwards.** Countries are coloured by the frequency of MDR cases as per the inset legend. **(B) Drug resistance trends over time plot shows frequencies of resistance to selected drug classes in Malawi per year.** Lines are coloured as per the inset legend. **(C) Annual genotype distribution plot shows the frequencies of pathogen genotypes circulating in Malawi per year.** Genotypes are coloured as per the inset legend. **(D) Resistance frequencies within genotypes plot shows frequencies of resistance to different drug classes, within common genotypes circulating in Malawi.** Bars are coloured according to the inset legend. **(E) Resistance frequencies within genotypes plot shows frequencies of resistance to different drug classes, within common genotypes circulating in Malawi between 2010 and 2012.** Bars are coloured as per the inset legend. **(F) Resistance determinants within genotypes plot shows the distribution of QRDR mutations mediating resistance to fluoroquinolones, within common pathogen genotypes between 2010 and 2012.** Bars are coloured as per the inset legend. **(G) Resistance frequencies within genotypes plot shows frequencies of resistance to different drug classes, within common genotypes circulating in Malawi between 2018 and 2019.** Bars are coloured as per the inset legend. **(H) Resistance determinants within genotypes plot shows the distribution of QRDR mutations mediating resistance to fluoroquinolones, within common pathogen genotypes between 2018 and 2019.** Bars are coloured as per the inset legend.
